# Supplementary material for: Effectiveness of a computerised system of patient education in clinical practice: a longitudinal nested cohort study
Source: PubMed Central journal article supplement — BMJ Open. 2018 May 3;8(5):e020621. doi: 10.1136/bmjopen-2017-020621 (PMC5942434; doi:10.1136/bmjopen-2017-020621), 2018-05-03
Supplement: bmjopen-2017-020621.draft_revisions.pdf [file bmjopen-2017-020621.draft_revisions.pdf]

# BMJ Open

BMJ Open is committed to open peer review. As part of this commitment we make the peer review history of every article we publish publicly available.

When an article is published we post the peer reviewers' comments and the authors' responses online. We also post the versions of the paper that were used during peer review. These are the versions that the peer review comments apply to.

The versions of the paper that follow are the versions that were submitted during the peer review process. They are not the versions of record or the final published versions. They should not be cited or distributed as the published version of this manuscript.

BMJ Open is an open access journal and the full, final, typeset and author-corrected version of record of the manuscript is available on our site with no access controls, subscription charges or pay-per-view fees (<http://bmjopen.bmj.com>).

If you have any questions on BMJ Open's open peer review process please email [info.bmjopen@bmj.com](mailto:info.bmjopen@bmj.com)

# BMJ Open

## Effectiveness of a Computerised System of Patient Education in Clinical Practice: a Longitudinal Nested Cohort Study

|                                 |                                                                                                                                                                                                                                                                                                                                                                                                                     |
|---------------------------------|---------------------------------------------------------------------------------------------------------------------------------------------------------------------------------------------------------------------------------------------------------------------------------------------------------------------------------------------------------------------------------------------------------------------|
| Journal:                        | <i>BMJ Open</i>                                                                                                                                                                                                                                                                                                                                                                                                     |
| Manuscript ID                   | bmjopen-2017-020621                                                                                                                                                                                                                                                                                                                                                                                                 |
| Article Type:                   | Protocol                                                                                                                                                                                                                                                                                                                                                                                                            |
| Date Submitted by the Author:   | 16-Nov-2017                                                                                                                                                                                                                                                                                                                                                                                                         |
| Complete List of Authors:       | Su, Chia-Hsien; China Medical University Hospital<br>Li, TsaiChung; China Medical University, Institute of Chinese Medicine<br>Cho, Der-Yang; China Medical University Hospital<br>Ma, Wei-Fen; China Medical University<br>Chang, Yu-Shan; China Medical University Hospital<br>Lee, Tsung-Han; China Medical University Hospital<br>Huang, Li-Chi; China Medical University, ; China Medical University Hospital, |
| <b>Primary Subject Heading</b>: | Health informatics                                                                                                                                                                                                                                                                                                                                                                                                  |
| Secondary Subject Heading:      | Nursing                                                                                                                                                                                                                                                                                                                                                                                                             |
| Keywords:                       | Health informatics < BIOTECHNOLOGY & BIOINFORMATICS, EDUCATION & TRAINING (see Medical Education & Training), HEALTH SERVICES ADMINISTRATION & MANAGEMENT                                                                                                                                                                                                                                                           |
|                                 |                                                                                                                                                                                                                                                                                                                                                                                                                     |

SCHOLARONE™  
Manuscripts

1  
2  
3 **Effectiveness of a Computerised System of Patient Education in Clinical Practice:**  
4 **a Longitudinal Nested Cohort Study**  
5  
6  
7  
8  
9

10 Chia-Hsien Su , Ph.D Candidate, RN, Department of Public Health, China Medical University,  
11 Taichung, Taiwan. Department of Nursing, China Medical University Hospital, Taichung,  
12 Taiwan. [chiahsien25@gmail.com](mailto:chiahsien25@gmail.com)  
13  
14

15  
16 Tsai-Chung Li, PhD, Professor, Graduate Institute of Biostatistics, China Medical University,  
17 Taiwan. [tcli@mail.cmu.edu.tw](mailto:tcli@mail.cmu.edu.tw)  
18  
19

20 Der-Yang Cho, Professor, Superintendent, Graduate Institute of Biomedical Sciences, China  
21 Medical University, Taichung, Taiwan. China Medical University Hospital, Taichung, Taiwan  
22 [d5057@mail.cmuh.org.tw](mailto:d5057@mail.cmuh.org.tw)  
23  
24

25  
26 Wei-Fen Ma, PhD, RN, Professor, Nursing of School, China Medical University; Adjunct  
27 Supervisor, Department of Nursing, China Medical University Hospital, Taiwan.  
28 [lhdaisy@mail.cmu.edu.tw](mailto:lhdaisy@mail.cmu.edu.tw)  
29  
30

31 Yu-Shan Chang, RN, MSN, Department of Nursing, China Medical University Hospital,  
32 Taiwan. Department of Public Health, China Medical University, Taichung, Taiwan.  
33 [yushan588@yahoo.com.tw](mailto:yushan588@yahoo.com.tw)  
34  
35

36  
37 Tsung-Han Lee, Computer programmer, Information Technology Office, China Medical  
38 University Hospital, Taichung, Taiwan [a20562@mail.cmug.org.tw](mailto:a20562@mail.cmug.org.tw)  
39  
40  
41  
42  
43  
44  
45

46 **Correspondence**

47 Li-Chi Huang, EdD, RN, Associate Professor, School of Nursing, China Medical University;  
48 Adjunct Supervisor, Department of Nursing, China Medical University Children Hospital,  
49 Taiwan. E-mail: [lichi@mail.cmu.edu.tw](mailto:lichi@mail.cmu.edu.tw)  
50 Telephone: 886-4-2205-3366 ext 7120. Fax: 886-4-2205-3748  
51  
52  
53  
54  
55  
56  
57  
58  
59  
60

## Abstract

**Introduction:** Developing electronic medical record information systems is an international trend for promoting the integration of medical information and enhancing the quality of medical services. Patient education is a frequent intervention in nursing care and recording the amount and quality of patient education have become essential in the nursing record. The aims of this study are: (1) to develop a high quality Patient Education Assessment and Description Record System (PEADRS) in the electronic medical record; (2) to examine the effectiveness of the PEADRS on documentation and nurses' satisfaction; (3) to facilitate communication and cooperation between professionals.

**Methods and Analysis:** A quasi-experimental design and purposive sampling will be used. The participants are nurses who are operated the PEADRS. A prospective longitudinal nested cohort study will be conducted to compare the effectiveness of PEADRS, including: (1) the length of nurse documentation; (2) satisfaction with using PEADRS; and (3) the benefit to professional cooperation.

**Ethics and dissemination:** Patient privacy will be protected according to Electronic Medical Record Management Practices of the hospital. This study develops a patient education digital record system, which would profit the quality of clinical practice in health education. The results will be published in peer-reviewed journals and will present at scientific conferences.

**Keywords:** Health informatics, Education and training

**Word count: 3477**

### Strengths and limitations of this study

- We develop Patient Education Assessment and Description Record System (PEADRS) that is first linkage of patient education into nursing records digitally in the electronic medical information system.
- A prospective longitudinal nested cohort design was chosen to evaluate the effectiveness of PEADRS in the quality of patient education and professionals' cooperation.
- A potential limitation of the study is the small sample size, when patients with invasive procedures or examinations and operation that may affect the generalizability and external validity of the result of study.

## Introduction

The use of computerised systems in healthcare has been significantly growing globally. Electronic medical records are computerised systems that allow storage, retrieval and sharing of information among professionals.<sup>1</sup> Electronic medical record information systems standardise specific content, including documentation standards, storage, labelling and certification. Such records promote the integration of medical information to enhance the quality of medical services.<sup>2</sup>

Paper copies of medical records require large amounts of storage space. In addition, they increase the operating and personnel costs of hospitals. Medical records produced and stored in electronic format may preclude writing and storage of paper copies. Electronic records not only make access to medical records faster but also enhance the quality of service and improve the efficiency of medical resources.<sup>3</sup> To fulfil the requirements of the Electronic Medical Record Adoption Model (EMRAM) Stage 6 Award Survey in April 2017, our hospital had to achieve a near-paperless environment that harnesses technology to support optimised patient care.<sup>4</sup>

Patient education is an important nursing intervention<sup>5</sup> and an important aspect of the nursing documentation. Patient education has been viewed as an important part of providing quality healthcare that respects and safeguards the rights of patients. Research has shown that patient education provides knowledge regarding healthcare, establishes healthy behaviour, shortens hospitalisation and reduces re-hospitalisation.<sup>6</sup> Patient education is foundational for improving compliance with and success of patient engagement initiatives.<sup>7,8</sup> Patient education affects the patient's health status and reduces healthcare costs. It has also been recognised as an independent function of the nursing profession and is a planned, systematic and logical process.<sup>6,10</sup> Patient education is an important component of good quality

1  
2  
3 healthcare. One of the teaching methods follows the ASSURE (Assessment, Select materials,  
4 Utilise materials, Require learner response, Evaluation) model, which provides guidelines to  
5  
6 organise appropriate teaching for achieving health education.<sup>10, 11, 12</sup>  
7  
8  
9

10 Health insurance in Taiwan has nationwide coverage, which provides a comprehensive  
11 package of preventive measures and medical services.<sup>13</sup> It allows equal access to healthcare  
12 for all citizens by monitoring financial expenditures and improving healthcare outcomes. This  
13 high insurance rate results in an extremely high nurse-to-patient ratio in Taiwan compared  
14 with other countries and involves providing health education to patients when they are  
15 hospitalised.<sup>14</sup> Providing patient education requires time based on patient's needs and  
16 involves one-on-one discussion. Also, in clinical practice, patients need repeated education.  
17  
18  
19  
20  
21  
22  
23  
24

25 Since the Electronic Signature Act was enacted in 2001, the process of maintaining  
26 electronic and digital medical records has been rapidly developed.<sup>15</sup> The legal elements and  
27 effects of electronic medical records and signatures have become well-established under the  
28 act. These aspects have made electronic medical records popular and have accepted and  
29 included safe and reliable internet, electronic records and unduplicated signatures. Moreover,  
30 identification of health providers involved in patient care would benefit communication  
31 among healthcare professionals.<sup>16</sup> Therefore, electronic medical records store patient data,  
32 strengthen record quality and enable interprofessional cooperation to achieve the goal of  
33 providing optimum patient healthcare.  
34  
35  
36  
37  
38  
39  
40  
41  
42  
43  
44

45 Currently, health education is recorded under the content of caring activities in the  
46 nursing record section of the electronic medical record. Records of patient education were not  
47 easy to identify in the document. Professional health providers in different units are unaware  
48 of the type of health education the patient or the patient's family has received. Furthermore, it  
49 is difficult to follow-up patients' compliance with treatment after health education if the  
50 patient education details are not recorded. Thus, the development of a health education  
51  
52  
53  
54  
55  
56  
57  
58  
59  
60

1  
2  
3 informatics system would fill the gap between the actual patient education and continued  
4 patient healthcare.  
5  
6

7  
8 Developing a computerised system for patient education is not only to maintain a record  
9 but also to improve the working process of clinical practice, which includes appropriate  
10 methods, equipment and a computerised system for nurses. Developing an electronic patient  
11 education record system would be the last stage in completing nursing records digitally.  
12 Despite the benefit of storage space and the ease of transport, little is known about the  
13 effectiveness of documenting, nurses' satisfaction level and professional cooperation with the  
14 use of the Patient Education Assessment and Description Record System (PEADRS).  
15  
16  
17  
18  
19  
20  
21  
22

## 23 **Methods**

### 24 **Study aims**

25  
26 The aim of this study is to develop a PEADRS and evaluate the effectiveness of the  
27 system on documenting, nurses' satisfaction level and professional cooperation. The study  
28 will be conducted in two phases. The first phase is to establish the PEADRS. In the second  
29 phase, a quasi-experimental study will be conducted to evaluate the effectiveness of PEADRS.  
30  
31  
32  
33  
34  
35  
36  
37 To investigate the outcomes, the following research questions will be asked:

- 38  
39 1. How does the patient education care service influence the quality of patient  
40 education?  
41  
42
- 43 2. How does the PEADRS affect the length of nursing documentation and extent of  
44 completed patient education?  
45  
46
- 47 3. Is the satisfaction level of participants using the PEADRS different from those  
48 using traditional nursing records?  
49  
50
- 51 4. How does the PEADRS benefit professional cooperation?  
52  
53  
54  
55  
56  
57  
58  
59  
60



### Study conceptual framework

Converting the written records into electronic records (electronic medical records) is a developmental approach in the field of medical science. It can transform patient healthcare management into knowledge and information sharing through the processes of information transferring, integrating, classifying and supporting decision making of patients and healthcare providers for enhancing patients' quality of healthcare. PEADRS provides a model that is based on the ASSURE teaching model (Figure 1). The development process of a PEADRS includes technology, planning and management systems.

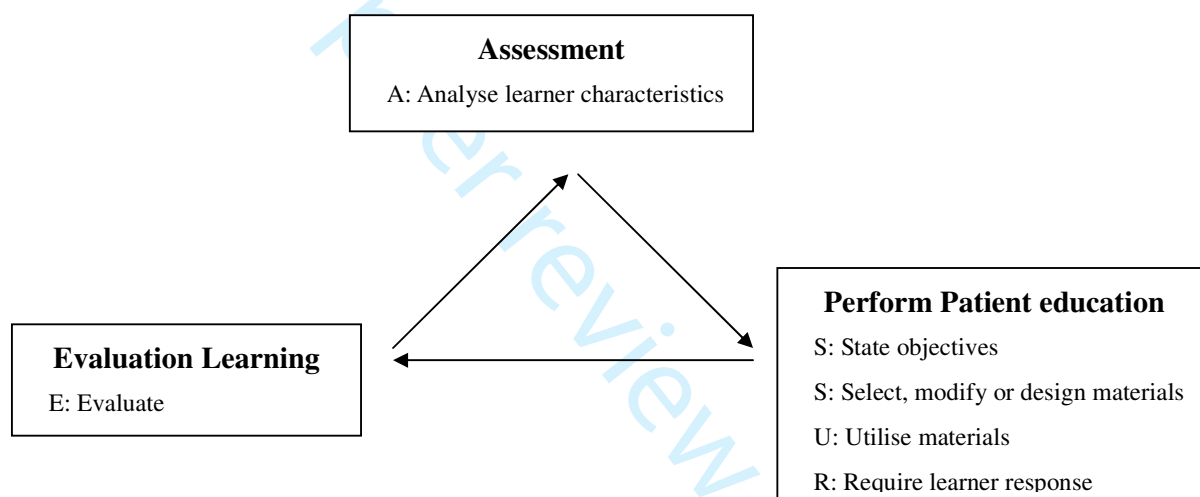

**Figure 1. Structure of PEADRS based on ASSURE Systematic Teaching Model**

### Design

The project involves a quasi-experimental design. The study will be conducted in two phases. In the first phase, the PEADRS will be established, developed and built. In the second phase, the effectiveness of the PEADRS will be evaluated, for which a non-synchronous design will be implemented. Subjects for the study will be recruited by purposive sampling of nurses providing education to patients admitted in a hospital or preparing for invasive examination or surgery. The study will be conducted in a medical centre in central Taiwan. A

total of 220 nurses will be recruited in each of the control group and the experimental group. The control group will use the traditional method of maintaining records in patient education, whereas the experimental group will apply the PEADRS for patient education and records.

### **Independent variables**

To assess the effectiveness of the PEADRS in patient education related to those admitted for invasive examination or surgery preparation, the following outcomes will be measured:

1. PEADRS application: applying the ASSURE teaching model to the system.
2. The length of the nursing documentation process: observing and recoding the time taken by nurses in documenting health education.
3. Record the integrity of health education: assessing the completion rate of nurses' record.
4. Satisfaction level of nurses using the PEADRS: questionnaire to evaluate satisfaction levels in nurses using the PEADRS.
5. Interprofessional cooperation: is the PEADRS a platform for cognate professionals.

### **Setting**

The study will be conducted in a medical centre in central Taiwan. The hospital is one of the nation's premier teaching hospitals with a capacity of 2111 beds. The hospital has 2980 health education materials in different languages, including brochures, posters and films. In the past decade, the average occupancy rate of hospitalised patients was 85% in this hospital. Many nurses are occupied in implementing health education and recording data.

### **Participants**

The participants include nursing staff who are recruited through convenience sampling from the medical centre in central Taiwan. The inclusion criteria are that they should be registered nurses, have a work experience of more than 3 months and should be working in a general ward. Participants will be excluded if they are working as assistant personnel. The

1  
2  
3 optimal sample size was calculated using G\*Power 3.1., with a mean difference of  $\alpha = 0.05$   
4 and effect size of 0.2 in one sample case with pre-test and post-test. Overall, 199 participants  
5 will be required to achieve a power of 80% to detect statistically significant differences. A  
6 total of 220 participants will be recruited, with 10% possibly missing in data collection. The  
7 same number of participants will be recruited for the control group. The control group will  
8 use the original method of recoding patient education in nursing records, and the experimental  
9 group will use the PEADRS.  
10  
11  
12  
13  
14  
15  
16  
17

18 To determine the effectiveness and stability of the PEADRS, the following procedures  
19 will be included: (1) PEADRS interface design guidance to guide the operation of priority  
20 steps; (2) the consistency of data linking to the nursing care system, assisting nurses to  
21 determine patient facts and amendments; (3) set the content of professional care aspects and  
22 their description, meeting the needs of health education records; (4) the convenience for users  
23 (nurses); and (5) stability of informatics system. A pilot study was conducted to identify the  
24 barriers to and operation of using the PEADRS. A group of 30 nurses was recruited to make  
25 appropriate amendments.  
26  
27  
28  
29  
30  
31  
32  
33  
34  
35

### 36 **Developing and establishing PEADRS**

- 37 1. Establishing a system-developed project team: The team members included a primary  
38 investigator, two co-primary investigators (patient education committee chairman,  
39 director of nursing), two clinical health educators with more than 10 years of experience,  
40 five clinical nurses with 15 years of experience of working in a medical centre (internal  
41 medicine, surgery, obstetrics and gynaecology, paediatrics and emergency department),  
42 four senior technicians (internal medicine, surgery, rehabilitation and haemodialysis) and  
43 one informatics programmer. Several clinical observations of patient education were  
44 arranged for the informatics programmer to understand its implementation to reduce the  
45 cognitive gap and meet the needs of the users.  
46  
47  
48  
49  
50  
51  
52  
53  
54  
55  
56  
57  
58  
59  
60

- 1  
2  
3 2. Regular meeting: The team met twice a week for discussion. The nursing department was  
4 responsible for collecting information and setting up computer screen interfaces for the  
5 system and reviewing and analysing the current status of the implementation of the  
6 records. Relevant health education for different departments was encouraged by setting  
7 up procedures for patient education, including assessment and implementation,  
8 developing education content and documenting methods.  
9
- 10  
11 3. Setting up the projects: The system includes five professional care aspects: outpatient  
12 care, adult patient care, paediatric patient care, examination and treatment care and  
13 Chinese traditional medicine care. The content and procedure of health education can be  
14 divided into steps. For example, taking care of a wound would involve the following  
15 procedures: (1) keeping the wound clean and dry; (2) observing for signs of infection,  
16 including swelling, soreness and abnormal secretions; (3) taking wound-dressing  
17 precautions and knowing when to call for the nurse; (4) knowing how to use  
18 Steri-Strip/Adhesive Skin Closure; (5) using waterproof cover on the wound before  
19 shower; (6) having information regarding care of wound caused during removal of  
20 arterial catheter; and (7) knowing how to use Tegaderm Hydrocolloid Dressings.  
21
- 22  
23 4. Applying the ASSURE systematic teaching model: The process of ASSURE includes  
24 assessment prior to health education, implementation of health education and evaluation  
25 of health education on the functional interface of the PEADRS. The design and  
26 development of the assessment contents are based on the literature review and  
27 recommendations of clinical practice experiences and the experts' advices. It includes an  
28 assessment lens related to patient characteristics and the ability to learn, formulating the  
29 strategies to implement health education instruction and evaluating the learning outcome  
30 based on learners' understanding level (Figure 2).  
31  
32  
33  
34  
35  
36  
37  
38  
39  
40  
41  
42  
43  
44  
45  
46  
47  
48  
49  
50  
51  
52  
53  
54  
55  
56  
57  
58  
59  
60

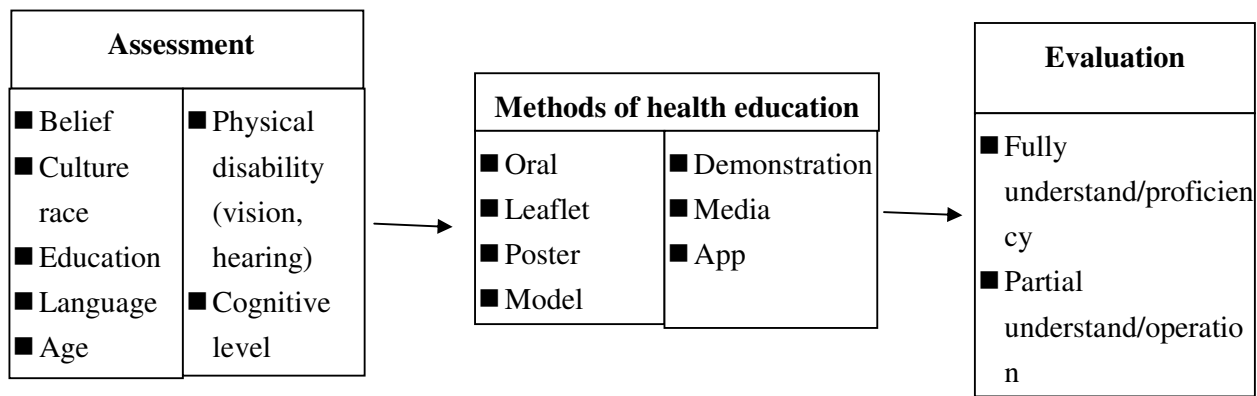

Figure 2. PEADRS Design

Peer review only

1  
2  
3  
4  
5  
6  
7  
8  
9  
10  
11  
12  
13  
14  
15  
16  
17  
18  
19  
20  
21  
22  
23  
24  
25  
26  
27  
28  
29  
30  
31  
32  
33  
34  
35  
36  
37  
38  
39  
40  
41  
42  
43  
44  
45  
46  
47  
48  
49  
50  
51  
52  
53  
54  
55  
56  
57  
58  
59  
60

- 1  
2  
3  
4  
5  
6  
7  
8  
9  
10  
11  
12  
13  
14  
15  
16  
17  
18  
19  
20  
21  
22  
23  
24  
25  
26  
27  
28  
29  
30  
31  
32  
33  
34  
35  
36  
37  
38  
39  
40  
41  
42  
43  
44  
45  
46  
47  
48  
49  
50  
51  
52  
53  
54  
55  
56  
57  
58  
59  
60
5. Operation system: The development of simple input interface was designed by the information programme engineer who also integrated the interface control software. To delaminate implementation of the ASSURE systematic teaching model, the following were the operation guidelines with priority steps: ‘assessment of patients’; ‘implementation of health education’; and ‘evaluation of learning’. The components embedded into the design along with health education items allow addition of all types of special components or integration of system functional elements. To simplify the process, after clicking on the data entry, ‘Nursing Integration System’ of the ‘assessment of patient’, this will be linked to ‘electronic medical record system’. All functions within the Nursing Integrated System automatically generate patient records, resulting in the associated data, functional window prompts and feedback. Nurses in different duty shifts can use the ‘inquiry’ function to find any related health information and know about the patient/family members who have received health education and the type of health education.
  6. Confidentiality and stability: According to the regulation of electronic medical records, the establishment of information management system will ensure the stability, reliability, system confidentiality and security of the overall system operation.

### Instruments

There are several methods to evaluate the study outcomes, including clinical data, nursing record review, observation and questionnaire. To ensure reliable and unbiased extraction of data from the observation, research assistants will be trained in observing, recording and accounting data. Inter-rater reliability of the study will be noted.

A self-report questionnaire will help to measure the satisfaction level of nurses using the

1  
2  
3 PEADRS. Questions will be based on the users' adoption and implementation of the PEADRS.  
4  
5 The questionnaire includes 15 questions that are answered on a 5-point Likert scale, ranging  
6  
7 from 'very good' to 'very bad'. To have an in-depth understanding of the constructive views  
8  
9 of nurses, their attitude and their demands, two open-ended questions will be added: 1)  
10  
11 enhancing factors in adopting the PEADRS; and 2) impeding factors in adopting the  
12  
13 PEADRS.  
14  
15

16  
17 Professional cooperation will be measured by the PEADRS system. The system would  
18  
19 provide the choice of a date range (seven or all), on which health education items  
20  
21 implemented through the system can be queried across departments (professionals). Nurses  
22  
23 can choose the 'query' option to understand what type of information was already provided to  
24  
25 the patient/family members and can continue to follow-up on their response  
26  
27 (reaction/adherence).  
28  
29

### 30 **Data Collection and Analysis**

31  
32

33  
34 After the PEADRS is established, baseline data regarding the time of implementing  
35  
36 health education and record will be collected, for which a total of 220 nurses providing health  
37  
38 education to inpatients with various invasive examination and surgery will be enrolled. The  
39  
40 time taken by the nurses for documenting patient education will be observed and recorded.  
41  
42 Data on the satisfaction level of nurses using the PEADRS will be collected using a  
43  
44 questionnaire. The results of professional cooperation will be measured by checking the  
45  
46 record on the PEADRS and the questionnaire.  
47  
48

49  
50 The data will be analyzed using descriptive and inferential statistics. To evaluate PEADRS,  
51  
52 the McNemar and paired t tests will be used to calculate the means of length of the nursing  
53  
54 documentation between pretest and post-test responses. Next, a t-test will be conducted to  
55  
56 compare the two groups in recording the integrity of health education, satisfaction level and  
57  
58

1  
2  
3 interprofessional cooperation. An alpha level of 0.05 will be designated as statistically  
4  
5 significant.  
6  
7

### 8 **Ethics and dissemination**

9

10 Procedure for protecting individual information confidentiality will be followed by  
11  
12 electronic medical record management practices of hospitals in accordance with the national  
13  
14 medical law and personal data protection law. The ethical approval has been processed in the  
15  
16 Institutional Review Board of China Medical University Hospital. The study excludes all  
17  
18 individual identification of participants or demographics data. Participants' privacy will be  
19  
20 protected according to Electronic Medical Record Management Practices of the hospital.  
21  
22  
23

### 24 **Discussion**

25

26 Informatics system have contributed to healthcare.<sup>15</sup> The development and application of  
27  
28 the PEARDS is an important stage in promoting a smarter medical care. It is the first act in  
29  
30 integrating health education resources into a computerised system in electronic medical  
31  
32 records. The study is expected to achieve the following: (1) establishing an assessment,  
33  
34 description and record informatics system on patient education for clinical practice in  
35  
36 electronic medical records; (2) guiding nurses to provide patient education with the ASSURE  
37  
38 systematic teaching model. The results of this study will help nurses to assess the needs of  
39  
40 patients/family members for education, such as physical and psychological barrier and  
41  
42 emotional status. Thus, it would help nurses to choose an appropriate method for the learner  
43  
44 based on assessment and evaluation of learning outcomes; (3) enabling nurses, easily, to  
45  
46 review patient data related to health education, which will not only reduce repetition of  
47  
48 teaching but also emphasise the evaluation of learning to provide efficacious education. The  
49  
50 nurses will recognise the type of patient education that patients/family members have already  
51  
52 received, thus facilitating coordination, communication and cooperation between healthcare  
53  
54  
55  
56  
57  
58  
59  
60



1  
2  
3 providers. This would reduce the transmission time and help follow-up patient's adherence so  
4 that the patient could enjoy continuity and integrity of healthcare; (4) improving data  
5 consistency, recording integrity and minimising storage space for medical records; and (5)  
6 facilitating functional window prompts and feedback. The records cannot be saved until the  
7 data entry is completed; this improves the completion of patient education, which helps  
8 improve quality of care.  
9  
10  
11  
12  
13  
14  
15

### 16 **Limitations**

17  
18 Although the steps of the research process have been followed, there are limitations based  
19 on staffing, time and economic constraints: (1) education is a highly complex activity, which  
20 combines interactive situations with humanities, ethics and educational context. The  
21 relationship between the nurses and learners is subjective. The experimental research  
22 emphasises standardisation and repeated verification, but education is often unique and cannot  
23 be repeated; hence, the cause and effect in health education still has limitations; (2) the study  
24 involved conducting a survey on the nurses' implementation of patient education and digital  
25 record, as a representative of patients with invasive procedures or examinations and operation;  
26 thus, the results of this study may not be inferred to different types of patient education. (3)  
27 Although the nurses are willing to cooperate with the implementation and response, the  
28 variation in quality, teaching ability and system operation skills may have an impact on the  
29 effectiveness of the validity of the new system.  
30  
31  
32  
33  
34  
35  
36  
37  
38  
39  
40  
41  
42  
43  
44

### 45 **Conclusion**

46  
47 This study aims to study whether the PEADRS has a positive effect on the quality of health  
48 care. This study develops a PEADRS, which could help promote the quality of clinical  
49 practice. There is a significant gap in the electronic medical record information system. The  
50 quality of the caring process in patient education documentation is evident. The teaching  
51  
52  
53  
54  
55  
56  
57  
58  
59  
60

1  
2  
3 models such as assessment, teaching methods and evaluation of learning provide a guideline  
4 for nurses in patient education, which enhances the nurses' capability in health education. A  
5 study of nurse-end users of the PEADRS should be conducted for yielding more information  
6 about barriers, frustrations, quality needs and preferences of nursing staff. Also, a further  
7 study is needed to study the effect of the PEADRS on interprofessional cooperation. A  
8 follow-up study is planned to assess effects of user-designed system changes based on the  
9 results of this study. Further work following PEADRS improvements will explore the  
10 satisfaction of paramedical staff, including teamwork cooperation, integrated care and  
11 sustainability. This study will provide new information specific to patient education and will  
12 assist in providing an evidence-base for this innovation at a level that has not yet been  
13 established.

14  
15  
16  
17  
18  
19  
20  
21  
22  
23  
24  
25  
26  
27 **Contributions:** CHS is the principal investigator of the PEADRS. Study concept was given  
28 by CHS and DYC. CHS, TSL, WFM, THL, YSC and LCH contributed to design of the study  
29 and/or to the implementation of the Intervention. CHS wrote the manuscript and LCH revised  
30 for important intellectual contents. All authors approved the final manuscript.

31  
32  
33  
34  
35 **Competing interests:** None

36  
37  
38 **Funding:** This research received no specific grant from any funding agency in the public,  
39 commercial or not-for-profit sectors

40  
41  
42  
43 **Ethics approval:** The ethical approval has been processing in the Institutional Review Board  
44 of China Medical University Hospital.

45  
46  
47 **Data sharing:** This manuscript describes the study protocol for research that do not yet begin  
48 the data collection.

## References

1. Biron P, Metzger MH, Pezet C, et al. An Information Retrieval System for Computerized Patient Records in the Context of a Daily Hospital Practice: the Example of the Léon Bérard Cancer Center (France). *Appl Clin Informa* 2014;5:191-205.
2. Natarajan K, Stein D, Jain S, et al. An analysis of clinical queries in an electronic health record search utility. *Int J Med Inform* 2010;79:515–522.
3. Carrington JM, Effken JA, Fann F. Strengths and Limitations of the Electronic Health Record for Documenting Clinical Events. *Comput Inform Nurs* 2011; 29: 360–367.
4. Jarvis B, Johnson T, Butler PM, et al. Assessing the Impact of Electronic Health Records as an Enabler of Hospital Quality and Patient Satisfaction. *Acad Med* 2013; 1471–1477.
5. Jones J , Schilling K, Pesut D. Barriers and Benefits Associated with Nurses Information Seeking Related to Patient Education Needs on Clinical Nursing Units. *Open Nurs J* 2011;5:24-30.
6. Falvo D. Effective Patient Education: A Guide to Increased Adherence. Sudbury: Jones & Bartlett Learning 2010:P461-465.
7. Berkman ND, Sheridan SL, Donahue KE et al. Low Health Literacy and Health Outcomes: An Updated Systematic Review. *Ann Intern Med* 2011;155:97-107.
8. Inzucchi SE, Bergenstal RM, Buse JB, et al. Management of Hyperglycemia in Type 2 Diabetes, 2015: A Patient-Centered Approach: Update to a Position Statement of the American Diabetes Association and the European Association for the Study of Diabetes. *Diabetes Care* 2015;38:140-149.
9. Marcus C. Strategies for improving the quality of verbal patient and family education: a review of the literature and creation of the EDUCATE model. *Health Psycho Behav Med* 2014;2:482-495.

10. Bergh AL, Karlsson J, Perssone E, et al. Registered nurses' perceptions of condition for patient education –focusing on organizational, environmental and professional cooperation aspects. *J Nurs Manag* 2012;20:758-770.
11. Branch, RM, Kopcha, TJ, Instructional Design Models Form Handbook of Research on Educational Communications and Technology. NY: Springer New York. 2014:77–87.
12. Bastable SB. Essentials of patient education. Sudbury (MA): Jones & Bartlett Learning; 2008. p. 203.
13. Lee YC, Huang YT, Tsai YW, et al. The impact of universal National Health Insurance on population health: the experience of Taiwan. *BMC Health Serv Res* 2010; 10:225.
14. Liang YW. Chen WY. Lee JL. Huang LC. Nurse staffing, direct nursing care hours and patient mortality in Taiwan: The longitudinal analysis of hospital nurse staffing and patient outcome study. *BMC Health Serv Res* 2012;12:44.
15. Bowman S. Impact of Electronic Health Record Systems on Information Integrity: Quality and Safety Implications. *Perspect Health Inf Manag* 2013; 10:1-13.
16. Victoroff MS. Electronic health records: what does your signature signify? *Patient Saf Surg* 2012; 6:20.

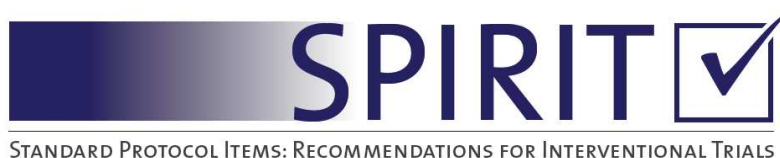

SPIRIT 2013 Checklist: Recommended items to address in a clinical trial protocol and related documents\*

| Section/item                      | Item No | Description                                                                                                                                                                                                                                                                              | Page No |
|-----------------------------------|---------|------------------------------------------------------------------------------------------------------------------------------------------------------------------------------------------------------------------------------------------------------------------------------------------|---------|
| <b>Administrative information</b> |         |                                                                                                                                                                                                                                                                                          |         |
| Title                             | 1       | Descriptive title identifying the study design, population, interventions, and, if applicable, trial acronym                                                                                                                                                                             | 1       |
| Trial registration                | 2a      | Trial identifier and registry name. If not yet registered, name of intended registry                                                                                                                                                                                                     | 16      |
|                                   | 2b      | All items from the World Health Organization Trial Registration Data Set                                                                                                                                                                                                                 |         |
| Protocol version                  | 3       | Date and version identifier                                                                                                                                                                                                                                                              |         |
| Funding                           | 4       | Sources and types of financial, material, and other support                                                                                                                                                                                                                              | 16      |
| Roles and responsibilities        | 5a      | Names, affiliations, and roles of protocol contributors                                                                                                                                                                                                                                  | 16      |
|                                   | 5b      | Name and contact information for the trial sponsor                                                                                                                                                                                                                                       |         |
|                                   | 5c      | Role of study sponsor and funders, if any, in study design; collection, management, analysis, and interpretation of data; writing of the report; and the decision to submit the report for publication, including whether they will have ultimate authority over any of these activities |         |
|                                   | 5d      | Composition, roles, and responsibilities of the coordinating centre, steering committee, endpoint adjudication committee, data management team, and other individuals or groups overseeing the trial, if applicable (see Item 21a for data monitoring committee)                         |         |
| <b>Introduction</b>               |         |                                                                                                                                                                                                                                                                                          |         |
| Background and rationale          | 6a      | Description of research question and justification for undertaking the trial, including summary of relevant studies (published and unpublished) examining benefits and harms for each intervention                                                                                       | 4-6     |
|                                   | 6b      | Explanation for choice of comparators                                                                                                                                                                                                                                                    |         |
| Objectives                        | 7       | Specific objectives or hypotheses                                                                                                                                                                                                                                                        | 6       |
| Trial design                      | 8       | Description of trial design including type of trial (eg, parallel group, crossover, factorial, single group), allocation ratio, and framework (eg, superiority, equivalence, noninferiority, exploratory)                                                                                | 7       |

**Methods: Participants, interventions, and outcomes**

|                      |     |                                                                                                                                                                                                                                                                                                                                                                                |    |
|----------------------|-----|--------------------------------------------------------------------------------------------------------------------------------------------------------------------------------------------------------------------------------------------------------------------------------------------------------------------------------------------------------------------------------|----|
| Study setting        | 9   | Description of study settings (eg, community clinic, academic hospital) and list of countries where data will be collected. Reference to where list of study sites can be obtained                                                                                                                                                                                             | 8  |
| Eligibility criteria | 10  | Inclusion and exclusion criteria for participants. If applicable, eligibility criteria for study centres and individuals who will perform the interventions (eg, surgeons, psychotherapists)                                                                                                                                                                                   | 8  |
| Interventions        | 11a | Interventions for each group with sufficient detail to allow replication, including how and when they will be administered                                                                                                                                                                                                                                                     | 9  |
|                      | 11b | Criteria for discontinuing or modifying allocated interventions for a given trial participant (eg, drug dose change in response to harms, participant request, or improving/worsening disease)                                                                                                                                                                                 |    |
|                      | 11c | Strategies to improve adherence to intervention protocols, and any procedures for monitoring adherence (eg, drug tablet return, laboratory tests)                                                                                                                                                                                                                              |    |
|                      | 11d | Relevant concomitant care and interventions that are permitted or prohibited during the trial                                                                                                                                                                                                                                                                                  |    |
| Outcomes             | 12  | Primary, secondary, and other outcomes, including the specific measurement variable (eg, systolic blood pressure), analysis metric (eg, change from baseline, final value, time to event), method of aggregation (eg, median, proportion), and time point for each outcome. Explanation of the clinical relevance of chosen efficacy and harm outcomes is strongly recommended | 8  |
| Participant timeline | 13  | Time schedule of enrolment, interventions (including any run-ins and washouts), assessments, and visits for participants. A schematic diagram is highly recommended (see Figure)                                                                                                                                                                                               | 12 |
| Sample size          | 14  | Estimated number of participants needed to achieve study objectives and how it was determined, including clinical and statistical assumptions supporting any sample size calculations                                                                                                                                                                                          | 9  |
| Recruitment          | 15  | Strategies for achieving adequate participant enrolment to reach target sample size                                                                                                                                                                                                                                                                                            | 9  |

**Methods: Assignment of interventions (for controlled trials)**

## Allocation:

|                                  |     |                                                                                                                                                                                                                                                                                                                                                          |   |
|----------------------------------|-----|----------------------------------------------------------------------------------------------------------------------------------------------------------------------------------------------------------------------------------------------------------------------------------------------------------------------------------------------------------|---|
| Sequence generation              | 16a | Method of generating the allocation sequence (eg, computer-generated random numbers), and list of any factors for stratification. To reduce predictability of a random sequence, details of any planned restriction (eg, blocking) should be provided in a separate document that is unavailable to those who enrol participants or assign interventions | 3 |
| Allocation concealment mechanism | 16b | Mechanism of implementing the allocation sequence (eg, central telephone; sequentially numbered, opaque, sealed envelopes), describing any steps to conceal the sequence until interventions are assigned                                                                                                                                                |   |
| Implementation                   | 16c | Who will generate the allocation sequence, who will enrol participants, and who will assign participants to interventions                                                                                                                                                                                                                                |   |

|    |                                                           |     |                                                                           |       |
|----|-----------------------------------------------------------|-----|---------------------------------------------------------------------------|-------|
| 1  |                                                           |     |                                                                           |       |
| 2  | Blinding                                                  | 17a | Who will be blinded after assignment to interventions (eg, trial          |       |
| 3  | (masking)                                                 |     | participants, care providers, outcome assessors, data analysts), and      |       |
| 4  |                                                           |     | how                                                                       |       |
| 5  |                                                           | 17b | If blinded, circumstances under which unblinding is permissible, and      |       |
| 6  |                                                           |     | procedure for revealing a participant's allocated intervention during     |       |
| 7  |                                                           |     | the trial                                                                 |       |
| 8  |                                                           |     |                                                                           |       |
| 9  | <b>Methods: Data collection, management, and analysis</b> |     |                                                                           |       |
| 10 | Data collection                                           | 18a | Plans for assessment and collection of outcome, baseline, and other       | 13    |
| 11 | methods                                                   |     | trial data, including any related processes to promote data quality (eg,  |       |
| 12 |                                                           |     | duplicate measurements, training of assessors) and a description of       |       |
| 13 |                                                           |     | study instruments (eg, questionnaires, laboratory tests) along with their |       |
| 14 |                                                           |     | reliability and validity, if known. Reference to where data collection    |       |
| 15 |                                                           |     | forms can be found, if not in the protocol                                |       |
| 16 |                                                           |     |                                                                           |       |
| 17 |                                                           | 18b | Plans to promote participant retention and complete follow-up,            |       |
| 18 |                                                           |     | including list of any outcome data to be collected for participants who   |       |
| 19 |                                                           |     | discontinue or deviate from intervention protocols                        |       |
| 20 | Data management                                           | 19  | Plans for data entry, coding, security, and storage, including any        | 13    |
| 21 |                                                           |     | related processes to promote data quality (eg, double data entry; range   |       |
| 22 |                                                           |     | checks for data values). Reference to where details of data               |       |
| 23 |                                                           |     | management procedures can be found, if not in the protocol                |       |
| 24 |                                                           |     |                                                                           |       |
| 25 | Statistical                                               | 20a | Statistical methods for analysing primary and secondary outcomes.         | 13-14 |
| 26 | methods                                                   |     | Reference to where other details of the statistical analysis plan can be  |       |
| 27 |                                                           |     | found, if not in the protocol                                             |       |
| 28 |                                                           |     |                                                                           |       |
| 29 |                                                           | 20b | Methods for any additional analyses (eg, subgroup and adjusted            |       |
| 30 |                                                           |     | analyses)                                                                 |       |
| 31 |                                                           | 20c | Definition of analysis population relating to protocol non-adherence      |       |
| 32 |                                                           |     | (eg, as randomised analysis), and any statistical methods to handle       |       |
| 33 |                                                           |     | missing data (eg, multiple imputation)                                    |       |
| 34 |                                                           |     |                                                                           |       |
| 35 | <b>Methods: Monitoring</b>                                |     |                                                                           |       |
| 36 |                                                           |     |                                                                           |       |
| 37 | Data monitoring                                           | 21a | Composition of data monitoring committee (DMC); summary of its            |       |
| 38 |                                                           |     | role and reporting structure; statement of whether it is independent      |       |
| 39 |                                                           |     | from the sponsor and competing interests; and reference to where          |       |
| 40 |                                                           |     | further details about its charter can be found, if not in the protocol.   |       |
| 41 |                                                           |     | Alternatively, an explanation of why a DMC is not needed                  |       |
| 42 |                                                           | 21b | Description of any interim analyses and stopping guidelines, including    |       |
| 43 |                                                           |     | who will have access to these interim results and make the final          |       |
| 44 |                                                           |     | decision to terminate the trial                                           |       |
| 45 |                                                           |     |                                                                           |       |
| 46 | Harms                                                     | 22  | Plans for collecting, assessing, reporting, and managing solicited and    |       |
| 47 |                                                           |     | spontaneously reported adverse events and other unintended effects of     |       |
| 48 |                                                           |     | trial interventions or trial conduct                                      |       |
| 49 |                                                           |     |                                                                           |       |
| 50 | Auditing                                                  | 23  | Frequency and procedures for auditing trial conduct, if any, and          |       |
| 51 |                                                           |     | whether the process will be independent from investigators and the        |       |
| 52 |                                                           |     | sponsor                                                                   |       |
| 53 |                                                           |     |                                                                           |       |
| 54 |                                                           |     |                                                                           |       |
| 55 |                                                           |     |                                                                           |       |
| 56 |                                                           |     |                                                                           |       |
| 57 |                                                           |     |                                                                           |       |
| 58 |                                                           |     |                                                                           |       |
| 59 |                                                           |     |                                                                           |       |
| 60 |                                                           |     |                                                                           |       |

## Ethics and dissemination

|                               |     |                                                                                                                                                                                                                                                                                     |    |
|-------------------------------|-----|-------------------------------------------------------------------------------------------------------------------------------------------------------------------------------------------------------------------------------------------------------------------------------------|----|
| Research ethics approval      | 24  | Plans for seeking research ethics committee/institutional review board (REC/IRB) approval                                                                                                                                                                                           | 14 |
| Protocol amendments           | 25  | Plans for communicating important protocol modifications (eg, changes to eligibility criteria, outcomes, analyses) to relevant parties (eg, investigators, REC/IRBs, trial participants, trial registries, journals, regulators)                                                    |    |
| Consent or assent             | 26a | Who will obtain informed consent or assent from potential trial participants or authorised surrogates, and how (see Item 32)                                                                                                                                                        |    |
|                               | 26b | Additional consent provisions for collection and use of participant data and biological specimens in ancillary studies, if applicable                                                                                                                                               |    |
| Confidentiality               | 27  | How personal information about potential and enrolled participants will be collected, shared, and maintained in order to protect confidentiality before, during, and after the trial                                                                                                | 14 |
| Declaration of interests      | 28  | Financial and other competing interests for principal investigators for the overall trial and each study site                                                                                                                                                                       | 16 |
| Access to data                | 29  | Statement of who will have access to the final trial dataset, and disclosure of contractual agreements that limit such access for investigators                                                                                                                                     |    |
| Ancillary and post-trial care | 30  | Provisions, if any, for ancillary and post-trial care, and for compensation to those who suffer harm from trial participation                                                                                                                                                       |    |
| Dissemination policy          | 31a | Plans for investigators and sponsor to communicate trial results to participants, healthcare professionals, the public, and other relevant groups (eg, via publication, reporting in results databases, or other data sharing arrangements), including any publication restrictions |    |
|                               | 31b | Authorship eligibility guidelines and any intended use of professional writers                                                                                                                                                                                                      |    |
|                               | 31c | Plans, if any, for granting public access to the full protocol, participant-level dataset, and statistical code                                                                                                                                                                     |    |

## Appendices

|                            |    |                                                                                                                                                                                                |  |
|----------------------------|----|------------------------------------------------------------------------------------------------------------------------------------------------------------------------------------------------|--|
| Informed consent materials | 32 | Model consent form and other related documentation given to participants and authorised surrogates                                                                                             |  |
| Biological specimens       | 33 | Plans for collection, laboratory evaluation, and storage of biological specimens for genetic or molecular analysis in the current trial and for future use in ancillary studies, if applicable |  |

---

\*It is strongly recommended that this checklist be read in conjunction with the SPIRIT 2013 Explanation & Elaboration for important clarification on the items. Amendments to the protocol should be tracked and dated. The SPIRIT checklist is copyrighted by the SPIRIT Group under the Creative Commons "[Attribution-NonCommercial-NoDerivs 3.0 Unported](https://creativecommons.org/licenses/by-nc-nd/3.0/)" license.



# BMJ Open

## Effectiveness of a Computerised System of Patient Education in Clinical Practice: a Longitudinal Nested Cohort Study

|                                 |                                                                                                                                                                                                                                                                                                                                                                                                                     |
|---------------------------------|---------------------------------------------------------------------------------------------------------------------------------------------------------------------------------------------------------------------------------------------------------------------------------------------------------------------------------------------------------------------------------------------------------------------|
| Journal:                        | <i>BMJ Open</i>                                                                                                                                                                                                                                                                                                                                                                                                     |
| Manuscript ID                   | bmjopen-2017-020621.R1                                                                                                                                                                                                                                                                                                                                                                                              |
| Article Type:                   | Protocol                                                                                                                                                                                                                                                                                                                                                                                                            |
| Date Submitted by the Author:   | 09-Mar-2018                                                                                                                                                                                                                                                                                                                                                                                                         |
| Complete List of Authors:       | Su, Chia-Hsien; China Medical University Hospital<br>Li, TsaiChung; China Medical University, Institute of Chinese Medicine<br>Cho, Der-Yang; China Medical University Hospital<br>Ma, Wei-Fen; China Medical University<br>Chang, Yu-Shan; China Medical University Hospital<br>Lee, Tsung-Han; China Medical University Hospital<br>Huang, Li-Chi; China Medical University, ; China Medical University Hospital, |
| <b>Primary Subject Heading</b>: | Health informatics                                                                                                                                                                                                                                                                                                                                                                                                  |
| Secondary Subject Heading:      | Nursing                                                                                                                                                                                                                                                                                                                                                                                                             |
| Keywords:                       | Health informatics < BIOTECHNOLOGY & BIOINFORMATICS, patient education, patient education record system                                                                                                                                                                                                                                                                                                             |
|                                 |                                                                                                                                                                                                                                                                                                                                                                                                                     |

SCHOLARONE™  
Manuscripts

only

1  
2  
3 **Effectiveness of a Computerised System of Patient Education in Clinical Practice:**  
4 **a Longitudinal Nested Cohort Study**  
5  
6  
7  
8

9 Chia-Hsien Su, Ph.D Candidate, RN, Department of Public Health, China Medical University,  
10 Taichung, Taiwan. Department of Nursing, China Medical University Hospital, Taichung,  
11 Taiwan. [chiahsien25@gmail.com](mailto:chiahsien25@gmail.com)  
12

13  
14 Tsai-Chung Li, PhD, Professor, Graduate Institute of Biostatistics, China Medical University,  
15 Taiwan. [tcli@mail.cmu.edu.tw](mailto:tcli@mail.cmu.edu.tw)  
16

17  
18 Der-Yang Cho, Professor, Superintendent, Graduate Institute of Biomedical Sciences, China  
19 Medical University, Taichung, Taiwan. China Medical University Hospital, Taichung, Taiwan  
20  
21 [d5057@mail.cmuh.org.tw](mailto:d5057@mail.cmuh.org.tw)  
22

23  
24 Wei-Fen Ma, PhD, RN, Professor, Nursing of School, China Medical University; Adjunct  
25 Supervisor, Department of Nursing, China Medical University Hospital, Taiwan.  
26  
27 [lhdaisy@mail.cmu.edu.tw](mailto:lhdaisy@mail.cmu.edu.tw)  
28

29  
30 Yu-Shan Chang, RN, MSN, Department of Nursing, China Medical University Hospital,  
31 Taiwan. Department of Public Health, China Medical University, Taichung, Taiwan.  
32  
33 [yushan588@yahoo.com.tw](mailto:yushan588@yahoo.com.tw)  
34

35  
36 Tsung-Han Lee, Computer programmer, Information Technology Office, China Medical  
37 University Hospital, Taichung, Taiwan [a20562@mail.cmug.org.tw](mailto:a20562@mail.cmug.org.tw)  
38

39  
40  
41  
42  
43  
44 **Correspondence**

45 Li-Chi Huang, EdD, RN, Associate Professor, School of Nursing, China Medical University;  
46 Adjunct Supervisor, Department of Nursing, China Medical University Children Hospital,  
47 Taiwan. E-mail: [lichi@mail.cmu.edu.tw](mailto:lichi@mail.cmu.edu.tw)  
48  
49 Telephone: 886-4-2205-3366 ext 7120. Fax: 886-4-2205-3748  
50  
51  
52  
53  
54  
55  
56  
57  
58  
59  
60

## Abstract

**Introduction:** Developing electronic health record information systems is an international trend for promoting the integration of health information and enhancing the quality of medical services. Patient education is a frequent intervention in nursing care and recording the amount and quality of patient education have become essential in the nursing record. The aims of this study are: (1) to develop a high quality Patient Education Assessment and Description Record System (PEADRS) in the electronic medical record; (2) to examine the effectiveness of the PEADRS on documentation and nurses' satisfaction; (3) to facilitate communication and cooperation between professionals.

**Methods and Analysis:** A quasi-experimental design and random sampling will be used. The participants are nurses who are involved in patient education by using traditional record or the PEADRS at a medical center. A prospective longitudinal nested cohort study will be conducted to compare the effectiveness of PEADRS, including: (1) the length of nursing documentation; (2) satisfaction with using PEADRS; and (3) the benefit to professional cooperation.

**Ethics and dissemination:** Patient privacy will be protected according to Electronic Medical Record Management Practices of the hospital. This study develops a patient education digital record system, which would profit the quality of clinical practice in health education. The results will be published in peer-reviewed journals and will present at scientific conferences.

Keywords: Health informatics, Patient education, Patient education record system

Strengths and limitations of this study

- We develop Patient Education Assessment and Description Record System (PEADRS) that is first linkage of patient education into nursing records digitally in the electronic medical information system.
- A prospective longitudinal nested cohort design was chosen to evaluate the effectiveness

1  
2  
3 of PEADRS in the quality of patient education and professionals' cooperation.  
4

5 • A potential limitation of the study is the small sample size, when patients with invasive  
6  
7 procedures or examinations and operation that may affect the generalizability and external  
8  
9 validity of the result of study  
10

11  
12  
13  
14  
15  
16 **Word count: 3308**  
17  
18  
19  
20  
21  
22  
23  
24  
25  
26  
27  
28  
29  
30  
31  
32  
33  
34  
35  
36  
37  
38  
39  
40  
41  
42  
43  
44  
45  
46  
47  
48  
49  
50  
51  
52  
53  
54  
55  
56  
57  
58  
59  
60

For peer review only

## Introduction

The use of computerised systems in healthcare has been growing globally. Electronic health records are computerised systems that allow storage, retrieval and sharing of information among professionals.<sup>1</sup> Electronic health record information systems standardise specific content, including documentation standards, storage, labelling and certification. Such records promote the integration of health information to enhance the quality of health services.<sup>2</sup>

Paper copies of health records require large amounts of storage space. In addition, they increase the operating and personnel costs of hospitals. Health records produced and stored in electronic format may preclude writing and storage of paper copies. Electronic records not only make access to health records faster but also enhance the quality of service and improve the efficiency of medical resources.<sup>3,4</sup> To fulfil the requirements of the Electronic Medical Record Adoption Model (EMRAM) Stage 6 Award Survey in April 2017, our hospital had to achieve a near-paperless environment that harnessed technology to support optimised patient care.<sup>5</sup>

Patient education is an important nursing intervention<sup>6</sup> and an important aspect of the nursing documentation. Patient education has been viewed as an important part of providing quality healthcare that respects and safeguards the rights of patients. Research has shown that patient education provides knowledge regarding healthcare, establishes healthy behaviour, shortens hospitalisation and reduces re-hospitalisation.<sup>7</sup> Patient education is foundational for improving compliance with and success of patient engagement initiatives.<sup>8,9,10</sup> Patient education affects the patient's health status and reduces healthcare costs. It has also been recognised as an independent function of the nursing profession and is a planned, systematic and logical process.<sup>7,11</sup> Patient education is an important component of good quality healthcare. One of the teaching methods follows the ASSURE (Assessment, Select materials,

1  
2  
3 Utilise materials, Require learner response, Evaluation) model, which provides guidelines to  
4  
5 organise appropriate teaching for achieving health education.<sup>11, 12, 13</sup>  
6  
7

8 Health insurance in Taiwan has nationwide coverage, which provides a comprehensive  
9  
10 package of preventive measures and health services.<sup>14</sup> It allows equal access to healthcare for  
11  
12 all citizens by monitoring financial expenditures and improving healthcare outcomes. This  
13  
14 high insurance rate results in an extremely high nurse-to-patient ratio in Taiwan compared  
15  
16 with other countries and involves providing health education to patients when they are  
17  
18 hospitalised.<sup>15</sup> Providing patient education requires time based on patient's needs and  
19  
20 involves one-on-one discussion. Also, in clinical practice, patients need repeated education.  
21  
22

23 Since the Electronic Signature Act was enacted in 2001, the process of maintaining  
24  
25 electronic and digital health records has been rapidly developed.<sup>16, 17</sup> The legal elements and  
26  
27 effects of electronic health records and signatures have become well-established under the act.  
28  
29 These aspects have made electronic health records popular and have accepted and included  
30  
31 safe and reliable internet, electronic records and unduplicated signatures. Moreover,  
32  
33 identification of health providers involved in patient care would benefit communication  
34  
35 among healthcare professionals.<sup>18, 19</sup> Therefore, electronic health records store patient data,  
36  
37 strengthen record quality and enable interprofessional cooperation to achieve the goal of  
38  
39 providing optimum patient healthcare.  
40  
41

42 Currently, health education is recorded under the content of caring activities in the  
43  
44 nursing record section of the electronic health record. Records of patient education were not  
45  
46 easy to identify in the document. Professional health providers in different units are unaware  
47  
48 of the type of health education the patient or the patient's family has received. Furthermore, it  
49  
50 is difficult to follow-up patients' compliance with treatment after health education if the  
51  
52 patient education details are not recorded. Thus, the development of a health education  
53  
54 informatics system would fill the gap between the actual patient education and continued  
55  
56

1  
2  
3 patient healthcare.  
4

5  
6 Developing a computerised system for patient education is not only to maintain a record  
7  
8 but also to improve the working process of clinical practice, which includes appropriate  
9  
10 methods, equipment and a computerised system for nurses.<sup>20</sup> Developing an electronic patient  
11  
12 education record system would be the last stage in completing nursing records digitally.<sup>21</sup>  
13  
14 Despite the benefit of storage space and the ease of transport, little is known about the  
15  
16 effectiveness of documenting, nurses' satisfaction level and professional cooperation with the  
17  
18 use of the Patient Education Assessment and Description Record System (PEADRS).<sup>22</sup>  
19

## 20 21 **Methods**

### 22 23 **Study aims**

24  
25  
26 The aim of this study is to develop a PEADRS and evaluate the effectiveness of the  
27  
28 system on documenting, nurses' satisfaction level and professional cooperation. The study  
29  
30 will be conducted in two phases. The first phase is to establish the PEADRS. In the second  
31  
32 phase, a quasi-experimental study will be conducted to evaluate the effectiveness of PEADRS.  
33  
34 To investigate the outcomes, the following research questions will be asked:  
35

- 36  
37  
38 1. How does the patient education care service influence the quality of patient  
39  
40 education?  
41  
42 2. How does the PEADRS affect the length of nursing documentation and extent of  
43  
44 completed patient education?  
45  
46 3. Is the satisfaction level of participants using the PEADRS different from those  
47  
48 using traditional nursing records?  
49  
50 4. How does the PEADRS benefit professional cooperation?  
51

### 52 53 **Study conceptual framework**

54  
55  
56 Converting the written records into electronic records (electronic health records) is a  
57

developmental approach in the field of medical science. It can transform patient healthcare management into knowledge and information sharing through the processes of information transferring, integrating, classifying and supporting decision making of patients and healthcare providers for enhancing patients' quality of healthcare. PEADRS provides a model that is based on the ASSURE teaching model (Figure 1). The development process of a PEADRS includes technology, planning and management systems.

### **Design**

The project involves a quasi-experimental design. The study will be conducted in two phases. In the first phase, the PEADRS will be established, developed and built. In the second phase, the effectiveness of the PEADRS will be evaluated, for which a non-synchronous design will be implemented. Subjects for the study will be recruited by random sampling of nurses providing education to patients admitted in a hospital or preparing for invasive examination or surgery in the general wards. The study will be conducted in a medical centre in central Taiwan. A total of 220 nurses will be recruited in each of the control group and the experimental group. The control group will use the traditional method of maintaining records in patient education, whereas the experimental group will apply the PEADRS for patient education and records.

### **Independent variables**

To assess the effectiveness of the PEADRS in patient education related to those admitted for invasive examination or surgery preparation, the following outcomes will be measured:

1. PEADRS application: applying the ASSURE teaching model to the system.
2. The length of the nursing documentation process: observing and recoding the time taken by nurses in documenting health education.
3. Record the integrity of health education: assessing the completion rate of nurses' record.



- 1
- 2
- 3
- 4 4. Satisfaction level of nurses using the PEADRS: questionnaire to evaluate satisfaction
- 5 levels in nurses using the PEADRS.
- 6
- 7 5. Interprofessional cooperation: is the PEADRS a platform for cognate professionals.
- 8
- 9

## 10 **Setting**

11 The study will be conducted in a medical centre in central Taiwan. The hospital is one of  
12 the nation's premier teaching hospitals with a capacity of 2111 beds. The hospital has 2980  
13 health education materials in different languages, including brochures, posters and films. In  
14 the past decade, the average occupancy rate of hospitalised patients was 85% in this hospital.  
15 Many nurses are occupied in implementing health education and recording data.  
16  
17  
18  
19  
20  
21  
22  
23

## 24 **Participants**

25 The participants include nursing staff who will be recruited through random sampling  
26 from the medical centre in central Taiwan. The inclusion criteria are that they should be  
27 registered nurses, have a work experience of more than 3 months and should be working in a  
28 general ward. Participants will be excluded if they are working as assistant personnel. The  
29 optimal sample size was calculated using G\*Power 3.1., with a mean difference of  $\alpha = 0.05$   
30 and effect size of 0.2 in one sample case with pre-test and post-test. Overall, 199 participants  
31 will be required to achieve a power of 80% to detect statistically significant differences. A  
32 total of 220 participants will be recruited, with 10% possibly missing in data collection. The  
33 same number of participants will be recruited for the control group. The control group will  
34 use the original method of recoding patient education in nursing records, and the experimental  
35 group will use the PEADRS.  
36  
37  
38  
39  
40  
41  
42  
43  
44  
45  
46  
47  
48  
49

50 To determine the effectiveness and stability of the PEADRS, the following procedures  
51 will be included: (1) PEADRS interface design guidance to guide the operation of priority  
52 steps; (2) the consistency of data linking to the nursing care system, assisting nurses to  
53  
54  
55  
56  
57  
58  
59  
60

1  
2  
3 determine patient facts and amendments; (3) set the content of professional care aspects and  
4 their description, meeting the needs of health education records; (4) the convenience for users  
5 (nurses); and (5) stability of informatics system. A pilot study was conducted to identify the  
6 barriers to and operation of using the PEADRS. A group of 30 nurses was recruited to make  
7 appropriate amendments.  
8  
9  
10  
11  
12

### 13 14 **Patient and Public Involvement**

15  
16 Patients and public will not be involved in this study.  
17  
18  
19

### 20 **Developing and establishing PEADRS**

- 21  
22 1. Establishing a system-developed project team: The team members include a primary  
23 investigator, two co-primary investigators (patient education committee chairman,  
24 director of nursing), two clinical health educators with more than 10 years of experience,  
25 five clinical nurses with 15 years of experience of working in a medical centre (internal  
26 medicine, surgery, obstetrics and gynaecology, paediatrics and emergency department),  
27 four senior technicians (internal medicine, surgery, rehabilitation and haemodialysis) and  
28 one informatics programmer. Several clinical observations of patient education are  
29 arranged for the informatics programmer to understand its implementation to reduce the  
30 cognitive gap and meet the needs of the users.  
31  
32  
33  
34  
35  
36  
37  
38  
39  
40
- 41 2. Regular meeting: The team meets twice a week for discussion. The nursing department is  
42 responsible for collecting information and setting up computer screen interfaces for the  
43 system and reviewing and analysing the current status of the implementation of the  
44 records. Relevant health education for different departments are encouraged by setting  
45 up procedures for patient education, including assessment and implementation,  
46 developing education content and documenting methods.  
47  
48  
49  
50  
51  
52
- 53 3. Setting up the projects: The system includes five professional care aspects: outpatient  
54 care, adult patient care, paediatric patient care, examination and treatment care and  
55  
56  
57  
58  
59  
60

Chinese traditional medicine care. The content and procedure of health education can be divided into steps. For example, taking care of a wound would involve the following procedures: (1) keeping the wound clean and dry; (2) observing for signs of infection, including swelling, soreness and abnormal secretions; (3) taking wound-dressing precautions and knowing when to call for the nurse; (4) knowing how to use Steri-Strip/Adhesive Skin Closure; (5) using waterproof cover on the wound before shower; (6) having information regarding care of wound caused during removal of arterial catheter; and (7) knowing how to use Tegaderm Hydrocolloid Dressings.

4. Applying the ASSURE systematic teaching model: The process of ASSURE includes assessment prior to health education, implementation of health education and evaluation of health education on the functional interface of the PEADRS. The design and development of the assessment contents are based on the literature review and recommendations of clinical practice experiences and the experts' advices. It includes an assessment lens related to patient characteristics and the ability to learn, formulating the strategies to implement health education instruction and evaluating the learning outcome based on learners' understanding level (Figure 2).
5. Operation system: The development of simple input interface was designed by the information programme engineer who also integrated the interface control software. To delaminate implementation of the ASSURE systematic teaching model, the following were the operation guidelines with priority steps: 'assessment of patients'; 'implementation of health education'; and 'evaluation of learning'. The components embedded into the design along with health education items allow addition of all types of special components or integration of system functional elements. To simplify the process, after clicking on the data entry, 'Nursing Integration System' of the 'assessment of patient', this will be linked to 'electronic health record system'. All functions in the Nursing Integrated System automatically generate patient records, resulting in the

1  
2  
3 associated data, functional window prompts and feedback. Nurses in different duty shifts  
4  
5 can use the ‘inquiry’ function to find any related health information and know about the  
6  
7 patient/family members who have received health education and the type of health  
8  
9 education.  
10

- 11  
12 6. Confidentiality and stability: According to the regulation of electronic medical records,  
13  
14 the establishment of information management system will ensure the stability, reliability,  
15  
16 system confidentiality and security of the overall system operation.  
17  
18

### 19 **Instruments**

20  
21  
22 Several methods will be used to evaluate the study outcomes, including clinical data,  
23  
24 nursing record review, observation, interview and questionnaire. To ensure reliable and  
25  
26 unbiased extraction of data from the observation, research assistants will be trained in  
27  
28 observing, recording, interviewing and accounting data. Inter-rater reliability of the study will  
29  
30 be noted.  
31  
32

33  
34 A self-report questionnaire will help to measure the satisfaction level of nurses using the  
35  
36 PEADRS. Questions are based on the users’ adoption and implementation of the PEADRS.  
37  
38 The questionnaire includes 12 questions that are answered on a 5-point Likert scale, ranging  
39  
40 from ‘very good’ to ‘very bad’. To have an in-depth understanding of the constructive views  
41  
42 of nurses, their attitude and their demands, two open-ended questions are added: 1) enhancing  
43  
44 factors in adopting the PEADRS; and 2) impeding factors in adopting the PEADRS. The  
45  
46 instrument’s readability, accuracy, and adaptability will be determined by panel of experts  
47  
48 and a pilot study. Face validity will be determined by expert review with a CVI calculation.  
49  
50 Reliability will be tested internal consistency by a pilot study with a sample of 30 nurses.  
51  
52

53  
54 Professional cooperation will be measured by the PEADRS system. The system would  
55  
56 provide the choice of a date range (seven or all), on which health education items  
57  
58  
59  
60

1  
2  
3 implemented through the system can be queried across departments (professionals). Nurses  
4 can choose the ‘query’ option to understand what type of information was already provided to  
5 the patient/family members and can continue to follow-up on their response  
6 (reaction/adherence). Thus, the system will record the times when patients visit different  
7 professionals (nurses/technician/pharmacist/etc) and have health education connected in time  
8 and completed. Also, the questions about satisfaction with professional cooperation is also  
9 provided in the instrument. For the control group, the professional cooperation can be  
10 observed and counted in the traditional nursing records.

### 21 **Data Collection and Analysis**

22  
23  
24 After the PEADRS is established, baseline data regarding the time of implementing  
25 health education and record will be collected, for which a total of 220 nurses providing health  
26 education to inpatients with various invasive examination and surgery will be enrolled. The  
27 time taken by the nurses for documenting patient education will be observed and recorded.  
28 Data on the satisfaction level of nurses using the PEADRS will be collected using a  
29 questionnaire. And data on nurses’ perspective on applying the PEADRS will be interviewed.  
30 The results of professional cooperation will be measured by checking the record on the  
31 PEADRS and the questionnaire.

32  
33  
34 The data will be analyzed using descriptive and inferential statistics. To evaluate  
35 PEADRS, the McNemar and paired t tests will be used to calculate the means of length of the  
36 nursing documentation between pretest and post-test responses. Next, a t-test will be  
37 conducted to compare the two groups in recording the integrity of health education,  
38 satisfaction level and interprofessional cooperation. An alpha level of 0.05 will be considered  
39 statistically significant.

### **Ethics and dissemination**

Procedure for protecting individual information confidentiality will be followed by electronic medical record management practices of hospitals in accordance with the national medical law and personal data protection law. Ethical approval was obtained from the Institutional Review Board of China Medical University Hospital (CMUH107-REC2-024). The study excludes all individual identification of participants or demographics data. Participants' privacy will be protected according to Electronic Medical Record Management Practices of the hospital.

### **Discussion**

Informatics system have contributed to healthcare.<sup>16</sup> The development and application of the PEARDS is an important stage in promoting a smarter medical care. It is the first act in integrating health education resources into a computerised system in electronic medical records. The study is expected to achieve the following: (1) establishing an assessment, description and record informatics system on patient education for clinical practice in electronic medical records; (2) guiding nurses to provide patient education with the ASSURE systematic teaching model. The results of this study will help nurses to assess the needs of patients/family members for education, such as physical and psychological barrier and emotional status. Thus, it would help nurses to choose an appropriate method for the learner based on assessment and evaluation of learning outcomes; (3) enabling nurses, easily, to review patient data related to health education, which will not only reduce repetition of teaching but also emphasise the evaluation of learning to provide efficacious education. The nurses will recognise the type of patient education that patients/family members have already received, thus facilitating coordination, communication and cooperation between healthcare providers. This would reduce the transmission time and help follow-up patient's adherence so that the patient could enjoy continuity and integrity of healthcare; (4) improving data

1  
2  
3 consistency, recording integrity and minimising storage space for medical records; and (5)  
4 facilitating functional window prompts and feedback. The records cannot be saved until the  
5 data entry is completed; this improves the completion of patient education, which helps  
6  
7 improve quality of care.  
8  
9  
10

### 11 12 **Limitations**

13  
14  
15 Although the steps of the research process have been followed, there are limitations based  
16 on staffing, time and economic constraints: (1) education is a highly complex activity, which  
17 combines interactive situations with humanities, ethics and educational context. The  
18 relationship between the nurses and learners is subjective. The experimental research  
19 emphasises standardisation and repeated verification, but education is often unique and cannot  
20 be repeated; hence, the cause and effect in health education still has limitations; (2) the study  
21 will involve conducting a survey on the nurses' implementation of patient education and  
22 digital record, as a representative of patients with invasive procedures or examinations and  
23 operation; thus, the results of this study may not be generalized to different types of patient  
24 education; (3) although the nurses are willing to cooperate with the implementation and  
25 response, the variation in quality, teaching ability and system operation skills may have an  
26 impact on the effectiveness of the validity of the new system.  
27  
28  
29  
30  
31  
32  
33  
34  
35  
36  
37  
38  
39  
40

### 41 **Conclusion**

42  
43 This study aims to study whether the PEADRS has a positive effect on the quality of health  
44 care. This study develops a PEADRS, which could help promote the quality of clinical  
45 practice. There is a significant gap in the electronic health record information system. The  
46 quality of the caring process in patient education documentation is evident. The teaching  
47 models such as assessment, teaching methods and evaluation of learning provide a guideline  
48 for nurses in patient education, which enhances the nurses' capability in health education. A  
49  
50  
51  
52  
53  
54  
55  
56  
57  
58  
59  
60

1  
2  
3 study of nurse-end users of the PEADRS should be conducted for yielding more information  
4 about barriers, frustrations, quality needs and preferences of nursing staff. Also, a further  
5 study is needed to study the effect of the PEADRS on patient outcome such as quality of life,  
6 medication adherence). A follow-up study is planned to assess effects of user-designed system  
7 changes based on the results of this study. Further work following PEADRS improvements  
8 will explore the satisfaction of paramedical staff, including teamwork cooperation, integrated  
9 care and sustainability. This study will provide new information specific to patient education  
10 and will assist in providing an evidence-base for this innovation at a level that has not yet  
11 been established.  
12  
13  
14  
15  
16  
17  
18  
19  
20  
21

22  
23 **Contributions:** CHS is the principal investigator of the PEADRS. Study concept was given  
24 by CHS and DYC. CHS, TSL, WFM, THL, YSC and LCH contributed to design of the study  
25 and/or to the implementation of the Intervention. CHS wrote the manuscript and LCH revised  
26 for important intellectual contents. All authors approved the final manuscript.  
27  
28  
29  
30

31 **Competing interests:** None  
32

33  
34 **Funding:** This research received no specific grant from any funding agency in the public,  
35 commercial or not-for-profit sectors  
36  
37

38  
39 **Ethics approval:** The ethical approval has been approved by the Institutional Review Board  
40 of China Medical University Hospital (CMUH107-REC2-024).  
41  
42

43 **Data sharing:** This manuscript describes the study protocol for research that do not yet begin  
44 the data collection.  
45  
46

47  
48 Competing interests: None  
49  
50  
51  
52  
53  
54  
55  
56  
57  
58  
59  
60



## References

1. Biron P, Metzger MH, Pezet C, et al. An Information Retrieval System for Computerized Patient Records in the Context of a Daily Hospital Practice: the Example of the Léon Bérard Cancer Center (France). *Appl Clin Informa* 2014;5:191-205.
2. Natarajan K, Stein D, Jain S, et al. An Analysis of Clinical Queries in an electronic health record search utility. *Int J Med Inform* 2010;79:515–522.
3. Carrington JM, Effken JA, Fann F. Strengths and Limitations of the Electronic Health Record for Documenting Clinical Events. *Comput Inform Nurs* 2011; 29: 360–367.
4. Peltonen LM, Alhuwail D, Ali S, et al. Current Trends in Nursing Informatics: Results of an International Survey. *Stud Health Technol Inform* 2016; 225: 938-9.
5. Jarvis B, Johnson T, Butler PM, et al. Assessing the Impact of Electronic Health Records as an Enabler of Hospital Quality and Patient Satisfaction. *Acad Med* 2013; 1471–1477.
6. Jones J , Schilling K, Pesut D. Barriers and Benefits Associated with Nurses Information Seeking Related to Patient Education Needs on Clinical Nursing Units. *Open Nurs J* 2011;5:24-30.
7. Falvo D. Effective Patient Education: A Guide to Increased Adherence. Sudbury: Jones & Bartlett Learning 2010:P461-465.
8. Berkman ND, Sheridan SL, Donahue KE et al. Low Health Literacy and Health Outcomes: An Updated Systematic Review. *Ann Intern Med* 2011;155:97-107.
9. Inzucchi SE, Bergenstal RM, Buse JB, et al. Management of Hyperglycemia in Type 2 Diabetes, 2015: A Patient-Centered Approach: Update to a Position Statement of the American Diabetes Association and the European Association for the Study of Diabetes. *Diabetes Care* 2015;38:140-149.
10. Marcus C. Strategies for improving the quality of verbal patient and family education: a review of the literature and creation of the EDUCATE model. *Health Psycho Behav Med* 2014;2:482-495.

11. Bergh AL, Karlsson J, Perssone E, et al. Registered nurses' perceptions of condition for patient education –focusing on organizational, environmental and professional cooperation aspects. *J Nurs Manag* 2012;20:758-770.
12. Branch, RM, Kopcha, TJ, Instructional Design Models Form Handbook of Research on Educational Communications and Technology. NY: Springer New York. 2014:77–87.
13. Bastable SB. Essentials of patient education. Sudbury (MA): Jones & Bartlett Learning; 2008. p. 203.
14. Lee YC, Huang YT, Tsai YW, et al. The impact of universal National Health Insurance on population health: the experience of Taiwan. *BMC Health Serv Res* 2010; 10:225.
15. Liang YW. Chen WY. Lee JL. Huang LC. Nurse staffing, direct nursing care hours and patient mortality in Taiwan: The longitudinal analysis of hospital nurse staffing and patient outcome study. *BMC Health Serv Res* 2012;12:44.
16. Bowman S. Impact of Electronic Health Record Systems on Information Integrity: Quality and Safety Implications. *Perspect Health Inf Manag* 2013; 10:1-13.
17. Victoroff MS. Electronic health records: what does your signature signify? *Patient Saf Surg* 2012; 6:20.
18. Cho I, Kim E, Choi WH, et al. Comparing Usability Testing Outcomes and Functions of Six Electronic Nursing Record Systems. *Int J Med Inform* 2016; 88: 78-85.
19. Varpio L, Rashotte J, Day K, et al. The EHR and building the patient's story: A qualitative investigation of how EHR use obstructs a vital clinical activity. *Int J Med Inform* 2015; 84(12): 1019-28.
20. Ratwani RM, Fairbanks RJ, Hettinger AZ, et al. Electronic health record usability: analysis of the user-centered design processes of eleven electronic health record vendors. *J Am Med Inform Assoc: JAMIA* 2015; 22(6): 1179-82.
21. Sittig DF, Wright A. What makes an EHR “open” or interoperable? *J Am Med Inform Assoc: JAMIA* 2015; 22(5): 1099-101.

- 1  
2  
3 22. Topaz M. et al. Nurse Informaticians Report Low Satisfaction and Multi-level Concerns  
4  
5 with Electronic Health Records: Results from an International Survey. *AMIA Annu Symp*  
6  
7 *Proc* 2016; 2016-2025.  
8  
9  
10  
11  
12

13  
14 Figure legends

15  
16 Figure 1. Structure of PEADRS based on ASSURE Systematic Teaching Model

17  
18 Figure 2. PEADRS Design  
19  
20  
21  
22  
23  
24  
25  
26  
27  
28  
29  
30  
31  
32  
33  
34  
35  
36  
37  
38  
39  
40  
41  
42  
43  
44  
45  
46  
47  
48  
49  
50  
51  
52  
53  
54  
55  
56  
57  
58  
59  
60

1  
2  
3  
4  
5  
6  
7  
8  
9  
10  
11  
12  
13  
14  
15  
16  
17  
18  
19  
20  
21  
22  
23  
24  
25  
26  
27  
28  
29  
30  
31  
32  
33  
34  
35  
36  
37  
38  
39  
40  
41  
42  
43  
44  
45  
46  
47  
48  
49  
50  
51  
52  
53  
54  
55  
56  
57  
58  
59  
60

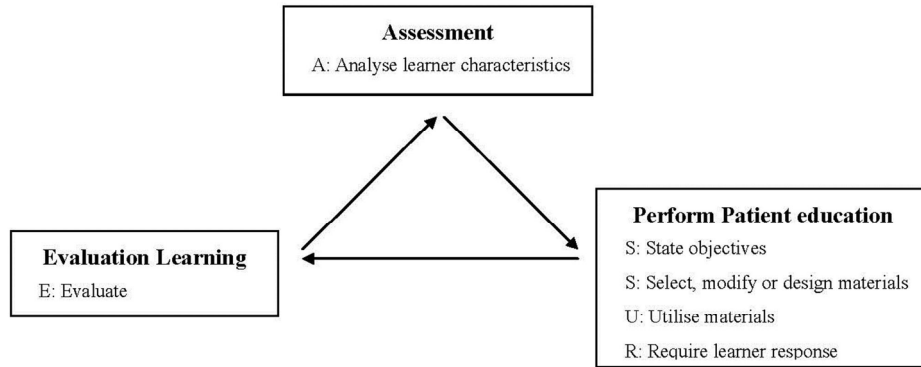

**Figure 1. Structure of PEADRS based on ASSURE Systematic Teaching Model**

Structure of PEADRS based on ASSURE Systematic Teaching Model

184x101mm (300 x 300 DPI)

review only

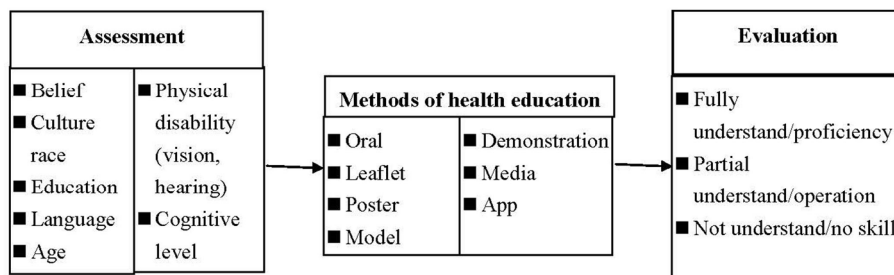

Figure 2. PEADRS Design

PEADRS Design

196x101mm (300 x 300 DPI)

review only

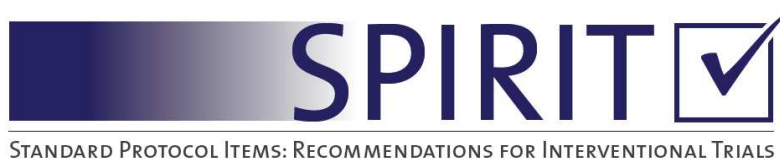

SPIRIT 2013 Checklist: Recommended items to address in a clinical trial protocol and related documents\*

| Section/item                      | Item No | Description                                                                                                                                                                                                                                                                              | Page No |
|-----------------------------------|---------|------------------------------------------------------------------------------------------------------------------------------------------------------------------------------------------------------------------------------------------------------------------------------------------|---------|
| <b>Administrative information</b> |         |                                                                                                                                                                                                                                                                                          |         |
| Title                             | 1       | Descriptive title identifying the study design, population, interventions, and, if applicable, trial acronym                                                                                                                                                                             | 1       |
| Trial registration                | 2a      | Trial identifier and registry name. If not yet registered, name of intended registry                                                                                                                                                                                                     | 16      |
|                                   | 2b      | All items from the World Health Organization Trial Registration Data Set                                                                                                                                                                                                                 |         |
| Protocol version                  | 3       | Date and version identifier                                                                                                                                                                                                                                                              |         |
| Funding                           | 4       | Sources and types of financial, material, and other support                                                                                                                                                                                                                              | 16      |
| Roles and responsibilities        | 5a      | Names, affiliations, and roles of protocol contributors                                                                                                                                                                                                                                  | 16      |
|                                   | 5b      | Name and contact information for the trial sponsor                                                                                                                                                                                                                                       |         |
|                                   | 5c      | Role of study sponsor and funders, if any, in study design; collection, management, analysis, and interpretation of data; writing of the report; and the decision to submit the report for publication, including whether they will have ultimate authority over any of these activities |         |
|                                   | 5d      | Composition, roles, and responsibilities of the coordinating centre, steering committee, endpoint adjudication committee, data management team, and other individuals or groups overseeing the trial, if applicable (see Item 21a for data monitoring committee)                         |         |
| <b>Introduction</b>               |         |                                                                                                                                                                                                                                                                                          |         |
| Background and rationale          | 6a      | Description of research question and justification for undertaking the trial, including summary of relevant studies (published and unpublished) examining benefits and harms for each intervention                                                                                       | 4-6     |
|                                   | 6b      | Explanation for choice of comparators                                                                                                                                                                                                                                                    |         |
| Objectives                        | 7       | Specific objectives or hypotheses                                                                                                                                                                                                                                                        | 6       |
| Trial design                      | 8       | Description of trial design including type of trial (eg, parallel group, crossover, factorial, single group), allocation ratio, and framework (eg, superiority, equivalence, noninferiority, exploratory)                                                                                | 7       |

**Methods: Participants, interventions, and outcomes**

|                      |     |                                                                                                                                                                                                                                                                                                                                                                                |       |
|----------------------|-----|--------------------------------------------------------------------------------------------------------------------------------------------------------------------------------------------------------------------------------------------------------------------------------------------------------------------------------------------------------------------------------|-------|
| Study setting        | 9   | Description of study settings (eg, community clinic, academic hospital) and list of countries where data will be collected. Reference to where list of study sites can be obtained                                                                                                                                                                                             | 8     |
| Eligibility criteria | 10  | Inclusion and exclusion criteria for participants. If applicable, eligibility criteria for study centres and individuals who will perform the interventions (eg, surgeons, psychotherapists)                                                                                                                                                                                   | 8-9   |
| Interventions        | 11a | Interventions for each group with sufficient detail to allow replication, including how and when they will be administered                                                                                                                                                                                                                                                     | 9     |
|                      | 11b | Criteria for discontinuing or modifying allocated interventions for a given trial participant (eg, drug dose change in response to harms, participant request, or improving/worsening disease)                                                                                                                                                                                 |       |
|                      | 11c | Strategies to improve adherence to intervention protocols, and any procedures for monitoring adherence (eg, drug tablet return, laboratory tests)                                                                                                                                                                                                                              |       |
|                      | 11d | Relevant concomitant care and interventions that are permitted or prohibited during the trial                                                                                                                                                                                                                                                                                  |       |
| Outcomes             | 12  | Primary, secondary, and other outcomes, including the specific measurement variable (eg, systolic blood pressure), analysis metric (eg, change from baseline, final value, time to event), method of aggregation (eg, median, proportion), and time point for each outcome. Explanation of the clinical relevance of chosen efficacy and harm outcomes is strongly recommended | 12-14 |
| Participant timeline | 13  | Time schedule of enrolment, interventions (including any run-ins and washouts), assessments, and visits for participants. A schematic diagram is highly recommended (see Figure)                                                                                                                                                                                               | 12    |
| Sample size          | 14  | Estimated number of participants needed to achieve study objectives and how it was determined, including clinical and statistical assumptions supporting any sample size calculations                                                                                                                                                                                          | 9     |
| Recruitment          | 15  | Strategies for achieving adequate participant enrolment to reach target sample size                                                                                                                                                                                                                                                                                            | 9     |

**Methods: Assignment of interventions (for controlled trials)**

## Allocation:

|                                  |     |                                                                                                                                                                                                                                                                                                                                                          |   |
|----------------------------------|-----|----------------------------------------------------------------------------------------------------------------------------------------------------------------------------------------------------------------------------------------------------------------------------------------------------------------------------------------------------------|---|
| Sequence generation              | 16a | Method of generating the allocation sequence (eg, computer-generated random numbers), and list of any factors for stratification. To reduce predictability of a random sequence, details of any planned restriction (eg, blocking) should be provided in a separate document that is unavailable to those who enrol participants or assign interventions | 8 |
| Allocation concealment mechanism | 16b | Mechanism of implementing the allocation sequence (eg, central telephone; sequentially numbered, opaque, sealed envelopes), describing any steps to conceal the sequence until interventions are assigned                                                                                                                                                |   |
| Implementation                   | 16c | Who will generate the allocation sequence, who will enrol participants, and who will assign participants to interventions                                                                                                                                                                                                                                |   |

|    |                                                           |     |                                                                           |       |
|----|-----------------------------------------------------------|-----|---------------------------------------------------------------------------|-------|
| 1  |                                                           |     |                                                                           |       |
| 2  | Blinding                                                  | 17a | Who will be blinded after assignment to interventions (eg, trial          |       |
| 3  | (masking)                                                 |     | participants, care providers, outcome assessors, data analysts), and      |       |
| 4  |                                                           |     | how                                                                       |       |
| 5  |                                                           | 17b | If blinded, circumstances under which unblinding is permissible, and      |       |
| 6  |                                                           |     | procedure for revealing a participant's allocated intervention during     |       |
| 7  |                                                           |     | the trial                                                                 |       |
| 8  |                                                           |     |                                                                           |       |
| 9  | <b>Methods: Data collection, management, and analysis</b> |     |                                                                           |       |
| 10 | Data collection                                           | 18a | Plans for assessment and collection of outcome, baseline, and other       | 13-14 |
| 11 | methods                                                   |     | trial data, including any related processes to promote data quality (eg,  |       |
| 12 |                                                           |     | duplicate measurements, training of assessors) and a description of       |       |
| 13 |                                                           |     | study instruments (eg, questionnaires, laboratory tests) along with their |       |
| 14 |                                                           |     | reliability and validity, if known. Reference to where data collection    |       |
| 15 |                                                           |     | forms can be found, if not in the protocol                                |       |
| 16 |                                                           |     |                                                                           |       |
| 17 |                                                           | 18b | Plans to promote participant retention and complete follow-up,            |       |
| 18 |                                                           |     | including list of any outcome data to be collected for participants who   |       |
| 19 |                                                           |     | discontinue or deviate from intervention protocols                        |       |
| 20 | Data management                                           | 19  | Plans for data entry, coding, security, and storage, including any        | 13-14 |
| 21 |                                                           |     | related processes to promote data quality (eg, double data entry; range   |       |
| 22 |                                                           |     | checks for data values). Reference to where details of data               |       |
| 23 |                                                           |     | management procedures can be found, if not in the protocol                |       |
| 24 |                                                           |     |                                                                           |       |
| 25 | Statistical                                               | 20a | Statistical methods for analysing primary and secondary outcomes.         | 14    |
| 26 | methods                                                   |     | Reference to where other details of the statistical analysis plan can be  |       |
| 27 |                                                           |     | found, if not in the protocol                                             |       |
| 28 |                                                           |     |                                                                           |       |
| 29 |                                                           | 20b | Methods for any additional analyses (eg, subgroup and adjusted            |       |
| 30 |                                                           |     | analyses)                                                                 |       |
| 31 |                                                           | 20c | Definition of analysis population relating to protocol non-adherence      |       |
| 32 |                                                           |     | (eg, as randomised analysis), and any statistical methods to handle       |       |
| 33 |                                                           |     | missing data (eg, multiple imputation)                                    |       |
| 34 |                                                           |     |                                                                           |       |
| 35 | <b>Methods: Monitoring</b>                                |     |                                                                           |       |
| 36 |                                                           |     |                                                                           |       |
| 37 | Data monitoring                                           | 21a | Composition of data monitoring committee (DMC); summary of its            |       |
| 38 |                                                           |     | role and reporting structure; statement of whether it is independent      |       |
| 39 |                                                           |     | from the sponsor and competing interests; and reference to where          |       |
| 40 |                                                           |     | further details about its charter can be found, if not in the protocol.   |       |
| 41 |                                                           |     | Alternatively, an explanation of why a DMC is not needed                  |       |
| 42 |                                                           | 21b | Description of any interim analyses and stopping guidelines, including    |       |
| 43 |                                                           |     | who will have access to these interim results and make the final          |       |
| 44 |                                                           |     | decision to terminate the trial                                           |       |
| 45 |                                                           |     |                                                                           |       |
| 46 | Harms                                                     | 22  | Plans for collecting, assessing, reporting, and managing solicited and    |       |
| 47 |                                                           |     | spontaneously reported adverse events and other unintended effects of     |       |
| 48 |                                                           |     | trial interventions or trial conduct                                      |       |
| 49 |                                                           |     |                                                                           |       |
| 50 | Auditing                                                  | 23  | Frequency and procedures for auditing trial conduct, if any, and          |       |
| 51 |                                                           |     | whether the process will be independent from investigators and the        |       |
| 52 |                                                           |     | sponsor                                                                   |       |
| 53 |                                                           |     |                                                                           |       |
| 54 |                                                           |     |                                                                           |       |
| 55 |                                                           |     |                                                                           |       |
| 56 |                                                           |     |                                                                           |       |
| 57 |                                                           |     |                                                                           |       |
| 58 |                                                           |     |                                                                           |       |
| 59 |                                                           |     |                                                                           |       |
| 60 |                                                           |     |                                                                           |       |



## Ethics and dissemination

|                               |     |                                                                                                                                                                                                                                                                                     |    |
|-------------------------------|-----|-------------------------------------------------------------------------------------------------------------------------------------------------------------------------------------------------------------------------------------------------------------------------------------|----|
| Research ethics approval      | 24  | Plans for seeking research ethics committee/institutional review board (REC/IRB) approval                                                                                                                                                                                           | 14 |
| Protocol amendments           | 25  | Plans for communicating important protocol modifications (eg, changes to eligibility criteria, outcomes, analyses) to relevant parties (eg, investigators, REC/IRBs, trial participants, trial registries, journals, regulators)                                                    |    |
| Consent or assent             | 26a | Who will obtain informed consent or assent from potential trial participants or authorised surrogates, and how (see Item 32)                                                                                                                                                        |    |
|                               | 26b | Additional consent provisions for collection and use of participant data and biological specimens in ancillary studies, if applicable                                                                                                                                               |    |
| Confidentiality               | 27  | How personal information about potential and enrolled participants will be collected, shared, and maintained in order to protect confidentiality before, during, and after the trial                                                                                                | 14 |
| Declaration of interests      | 28  | Financial and other competing interests for principal investigators for the overall trial and each study site                                                                                                                                                                       | 17 |
| Access to data                | 29  | Statement of who will have access to the final trial dataset, and disclosure of contractual agreements that limit such access for investigators                                                                                                                                     |    |
| Ancillary and post-trial care | 30  | Provisions, if any, for ancillary and post-trial care, and for compensation to those who suffer harm from trial participation                                                                                                                                                       |    |
| Dissemination policy          | 31a | Plans for investigators and sponsor to communicate trial results to participants, healthcare professionals, the public, and other relevant groups (eg, via publication, reporting in results databases, or other data sharing arrangements), including any publication restrictions |    |
|                               | 31b | Authorship eligibility guidelines and any intended use of professional writers                                                                                                                                                                                                      |    |
|                               | 31c | Plans, if any, for granting public access to the full protocol, participant-level dataset, and statistical code                                                                                                                                                                     |    |

## Appendices

|                            |    |                                                                                                                                                                                                |  |
|----------------------------|----|------------------------------------------------------------------------------------------------------------------------------------------------------------------------------------------------|--|
| Informed consent materials | 32 | Model consent form and other related documentation given to participants and authorised surrogates                                                                                             |  |
| Biological specimens       | 33 | Plans for collection, laboratory evaluation, and storage of biological specimens for genetic or molecular analysis in the current trial and for future use in ancillary studies, if applicable |  |

---

\*It is strongly recommended that this checklist be read in conjunction with the SPIRIT 2013 Explanation & Elaboration for important clarification on the items. Amendments to the protocol should be tracked and dated. The SPIRIT checklist is copyrighted by the SPIRIT Group under the Creative Commons "[Attribution-NonCommercial-NoDerivs 3.0 Unported](https://creativecommons.org/licenses/by-nc-nd/3.0/)" license.
